# Supplementary material
Source: publisher figshare collection journal article supplement (https://sage.figshare.com/ndownloader/files/17430437)
Supplement: Supplementary file 1 [file 17430437]

**Supplementary file : pain questionnaire**

| **Location of the pain**   - Breast scar - Anterior chest wall - Axilla - Arm | **Intensity score**   1. 10 2. 10 3. 10 4. 10 | |
| --- | --- | --- |
| **Timing**   - Postoperative pain - Duration of the pain after surgery   - More than 3 months   - More than 6 months   - More than 9 months   - More than 12 months   - More than 15 months   - More than 18 months   - More than 21 months   - More than 24 months   - More than 30 months   - More than 36 months   - More than 42 months   - More than 48 months - Frequency of the pain   - Every day   - Every two days   - Other | **YES** | **NO** |
| **Pain characteristics**   - Burning - Painful cold sensation - Electric shocks | **YES** | **NO** |
| **Symptoms associated with the pain**   - Swarming - Tingling - Numbness - Itching | **YES** | **NO** |
| **Hypoesthesia to the touch** | **YES** | **NO** |
| **Hypoesthesia to the injection** | **YES** | **NO** |
| **Is pain caused by friction ?** | **YES** | **NO** |
| **Is pain increased by movements of the shoulder ?** | **YES** | **NO** |
